# Supplementary material for: A new D–A–π–A type organic sensitizer based on substituted dihydroindolo [2,3-b] carbazole and DPP unit with a bulky branched alkyl chain for highly efficient DSCs
Source: Royal Society of Chemistry journal article supplement (doi:10.1039/c4ta05162a), 2014-11-19
Supplement: c4ta05162a1.pdf [file c4ta05162a1.pdf]

## Electronic Supplementary Information (ESI)

### **A new D-A- $\pi$ -A type organic sensitizer based on substituted dihydroindolo [2, 3-b] carbazole and DPP unit with a bulky branched alkyl chain for highly efficient DSCs**

Guojian Tian,<sup>a</sup> Shengyun Cai,<sup>a</sup> Xin Li,<sup>b</sup> Hans Ågren,<sup>b</sup> Qiaochun Wang,<sup>a</sup> Jinhai Huang<sup>a\*</sup> and Jianhua Su<sup>a\*</sup>

<sup>a</sup> Key Laboratory for Advanced Materials and Institute of Fine Chemicals, East China University of Science & Technology, 130 Meilong Road, Shanghai, 200237, PR China. Fax: 862164252288; E-mail: [bbsjh@ecust.edu.cn](mailto:bbsjh@ecust.edu.cn); [huangjh@ecust.edu.cn](mailto:huangjh@ecust.edu.cn).

<sup>b</sup> Division of Theoretical Chemistry and Biology, School of Biotechnology, KTH Royal Institute of Technology, SE-10691 Stockholm, Sweden.

1. The frontier orbital plots of the HOMO and LUMO of **T1-T2**(**Table 3**);
2. Computational analysis(**Table 4**), (**Fig. 4**);
3. Absorption curves of dyes **T1-T2** upon light irradiation of AM 1.5 solar light (30 min) with UV cutoff filter at 400 nm.
4. Normalized absorption and emission spectra of **T1-T2** in both solvent systems.
5. The absorption amounts of **T1-T2** in CHCl<sub>3</sub>: EtOH (v/v 3:7) and CH<sub>2</sub>Cl<sub>2</sub> were showed in **Table 5**.
6. The printout of elemental analysis of **T1-T2**.

1. The frontier orbital plots of the HOMO and LUMO of **T1-T2**.

|        | T1 | T2 |
|--------|----|----|
| HOMO-4 |    |    |
| HOMO-2 |    |    |
| HOMO-1 |    |    |
| HOMO   |    |    |
| LUMO   |    |    |
| LUMO+1 |    |    |
| LUMO+2 |    |    |

**Table 3.** Contour plots of frontier molecular orbitals of compounds **T1** and **T2**.

## 2. Computational analysis

| Compound  | State          | $\lambda_{abs}$ | $f$   | MO composition                                           |
|-----------|----------------|-----------------|-------|----------------------------------------------------------|
| <b>T1</b> | S <sub>1</sub> | 2.46 eV, 503 nm | 1.631 | H-2 -> L+0 (15%)<br>H-1 -> L+0 (59%)<br>H-1 -> L+1 (15%) |
|           | S <sub>2</sub> | 3.19 eV, 388 nm | 0.450 | H-4 -> L+0 (46%)<br>H-1 -> L+1 (30%)                     |
|           | S <sub>5</sub> | 3.54 eV, 349 nm | 1.145 | H-2 -> L+0 (30%)<br>H-2 -> L+1 (16%)<br>H-1 -> L+2 (11%) |
| <b>T2</b> | S <sub>1</sub> | 2.56 eV, 485 nm | 1.366 | H-2 -> L+0 (15%)<br>H-1 -> L+0 (58%)<br>H-1 -> L+1 (18%) |
|           | S <sub>5</sub> | 3.60 eV, 344 nm | 1.810 | H-2 -> L+0 (18%)<br>H-2 -> L+1 (25%)<br>H-1 -> L+0 (10%) |

**Table 4.** Computed excitation energies, oscillator strengths and molecular orbital (MO) compositions of important low-lying excited states of **T1** and **T2**.

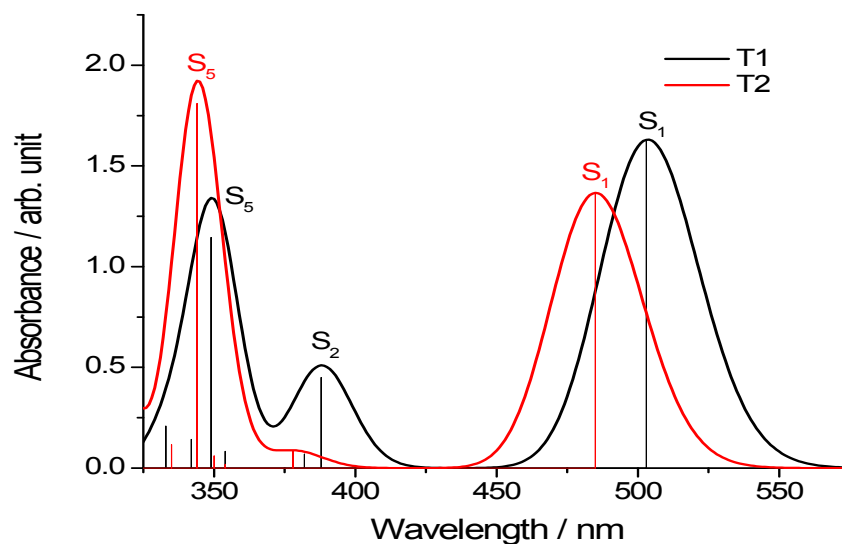

**Fig. 4** Simulated absorption spectra of **T1** and **T2**.

3. Absorption curves of dyes **T1-T2** upon light irradiation of AM 1.5 solar light (30 min) with UV cutoff filter at 400 nm.

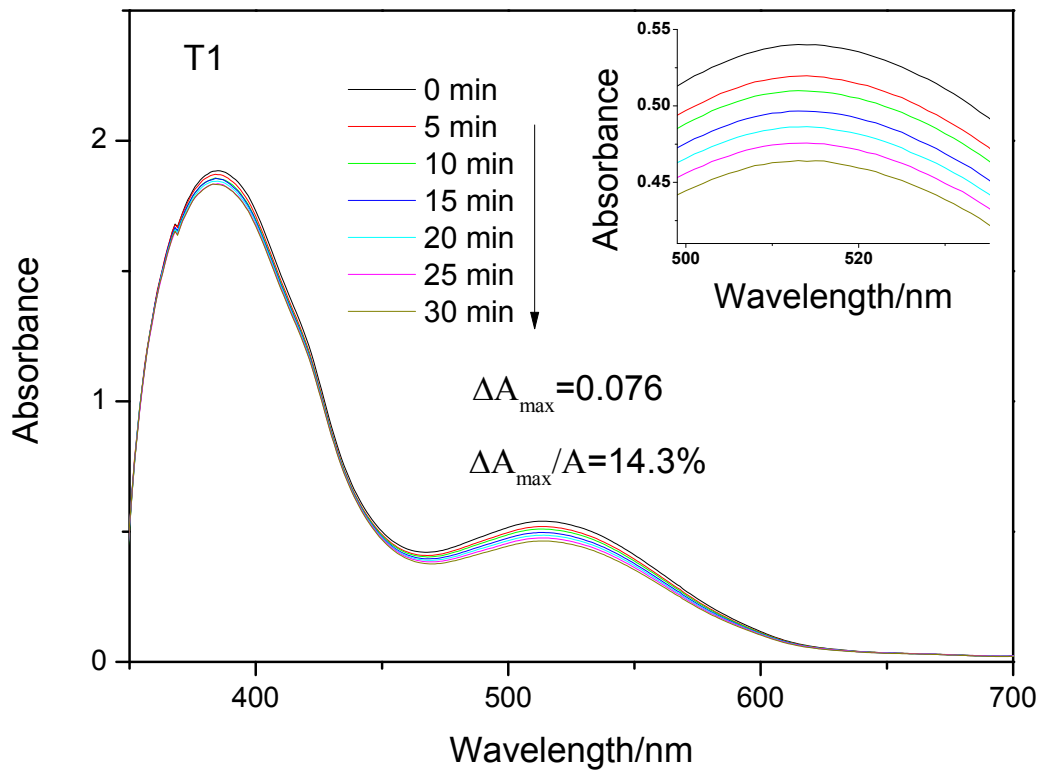

Absorption curves of dyes **T1** upon light irradiation of AM 1.5 solar light (30 min) with UV cutoff filter at 400 nm.

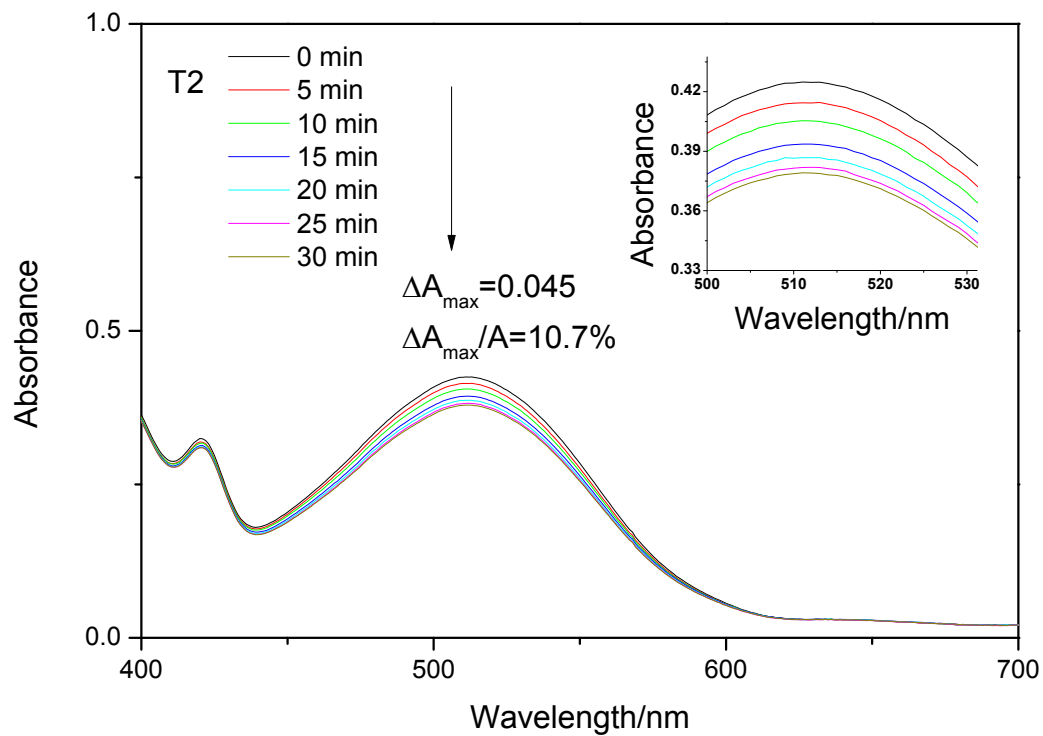

Absorption curves of dyes **T2** upon light irradiation of AM 1.5 solar light (30 min) with UV cutoff filter at 400 nm.

4. Normalized absorption and emission spectra of **T1-T2** in both solvent systems.

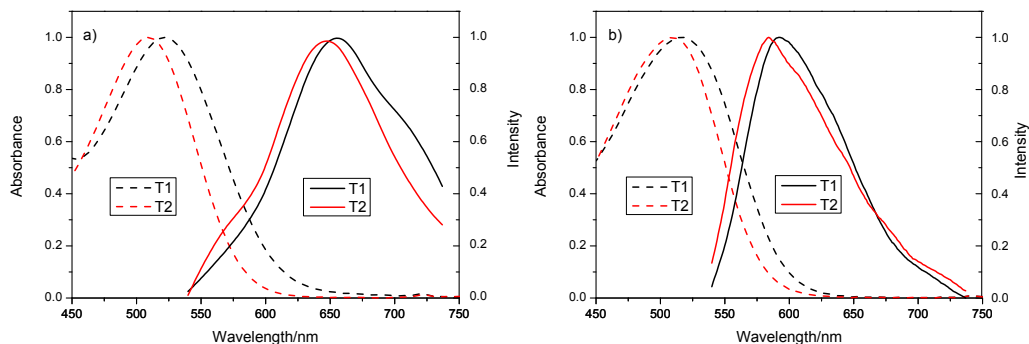

Normalized absorption and emission spectra of **T1-T2** in both solvent systems: a) was in  $\text{CH}_2\text{Cl}_2$ ; b) was in  $\text{CHCl}_3$ :  $\text{EtOH}$  ( $v/v$  3:7).

5. The absorption amounts of **T1-T2** in  $\text{CHCl}_3$ :  $\text{EtOH}$  ( $v/v$  3:7) and  $\text{CH}_2\text{Cl}_2$  were showed in Table 5.

| T1- $\text{CHCl}_3$ : $\text{EtOH}$      | T2- $\text{CHCl}_3$ : $\text{EtOH}$      | T1- $\text{CH}_2\text{Cl}_2$             | T2- $\text{CH}_2\text{Cl}_2$             |
|------------------------------------------|------------------------------------------|------------------------------------------|------------------------------------------|
| $2.32 \times 10^{-8}(\text{molcm}^{-2})$ | $1.94 \times 10^{-8}(\text{molcm}^{-2})$ | $2.68 \times 10^{-8}(\text{molcm}^{-2})$ | $2.34 \times 10^{-8}(\text{molcm}^{-2})$ |

Table 5. The absorption amounts of **T1-T2** in  $\text{CHCl}_3$ :  $\text{EtOH}$  ( $v/v$  3:7) and  $\text{CH}_2\text{Cl}_2$ . The corresponding absorption spectra were below:

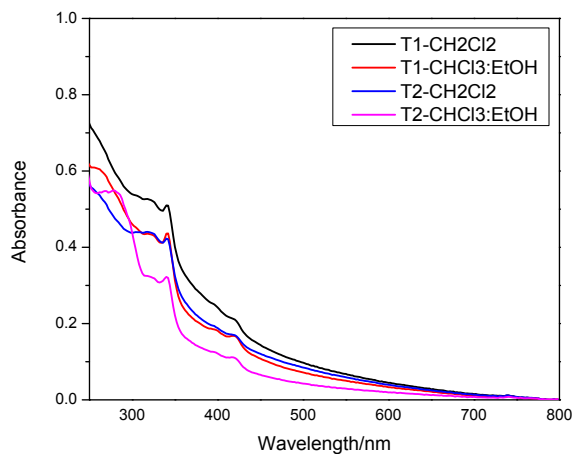

6. The printout of elemental analysis of T1-T2.

The analysis and test center in East China university of science and technology

The data of element analysis

Number:20140220

|               |                                |      |       |           |
|---------------|--------------------------------|------|-------|-----------|
| Department    | Fine chemical institution      |      |       |           |
| Name          | TH-TGJ-(1-2)                   |      |       |           |
| Content       | N, C, H                        |      |       |           |
| Instrument    | Germany elemental vario EL III |      |       |           |
| Results:      |                                |      |       |           |
| Sampling name | Sampling weight (mg)           | N%   | C%    | H%        |
| TH-TGJ-1      | 2.070                          | 5.19 | 79.83 | 7.29      |
|               | 2.107                          | 5.18 | 79.80 | 7.30      |
| TH-TGJ-2      | 2.115                          | 5.15 | 82.20 | 7.38      |
|               | 2.006                          | 5.14 | 82.19 | 7.39      |
|               |                                |      | Date  | 13/6 2014 |
